# Supplementary material for: Impact of Chitosan Molecular Weight and Attached Non-Interactive Chains on the Formation of α-Lactalbumin Nanogel Particles
Source: MDPI journal article supplement (doi:10.3390/gels3020014), 2017-04-26
Supplement: s1 [file s1]

# Impact of Chitosan Molecular Weight and Attached Non-Interactive Chains on the Formation of $\alpha$ -Lactalbumin Nanogel Particles

Juan Du, Young-Hee Cho, Ryan Murphy, and Owen Griffith Jones

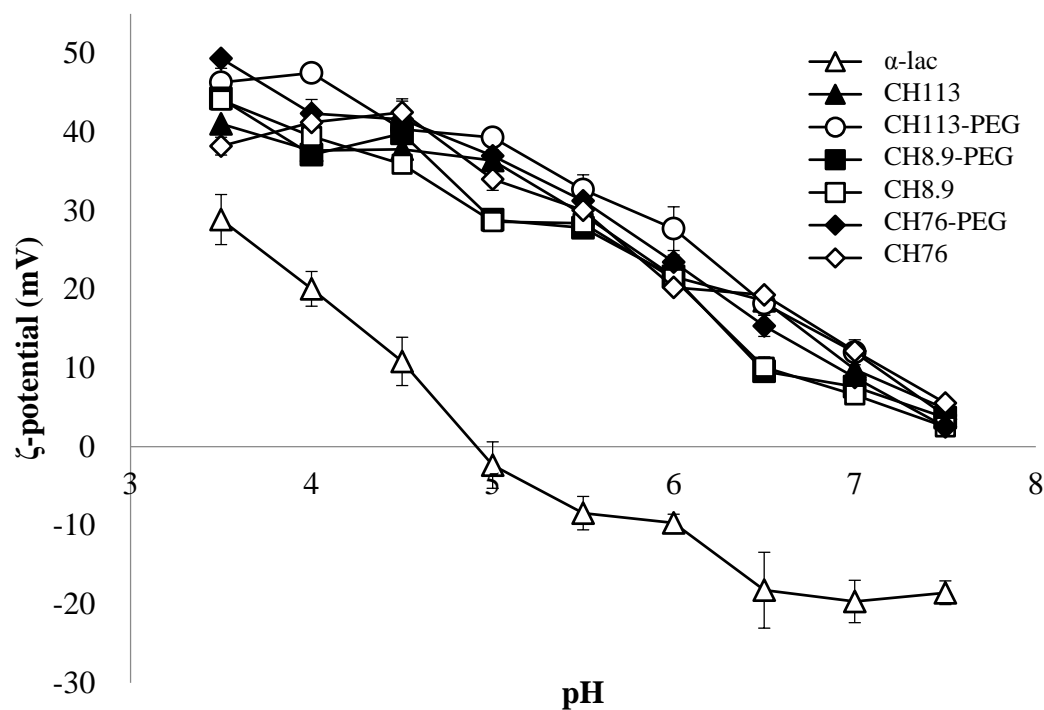

**Figure S1.**  $\zeta$ -Potential of  $\alpha$ -lactalbumin, chitosan (CH), or chitosan-*graft*-PEG (CH-PEG) as a function of solution pH.

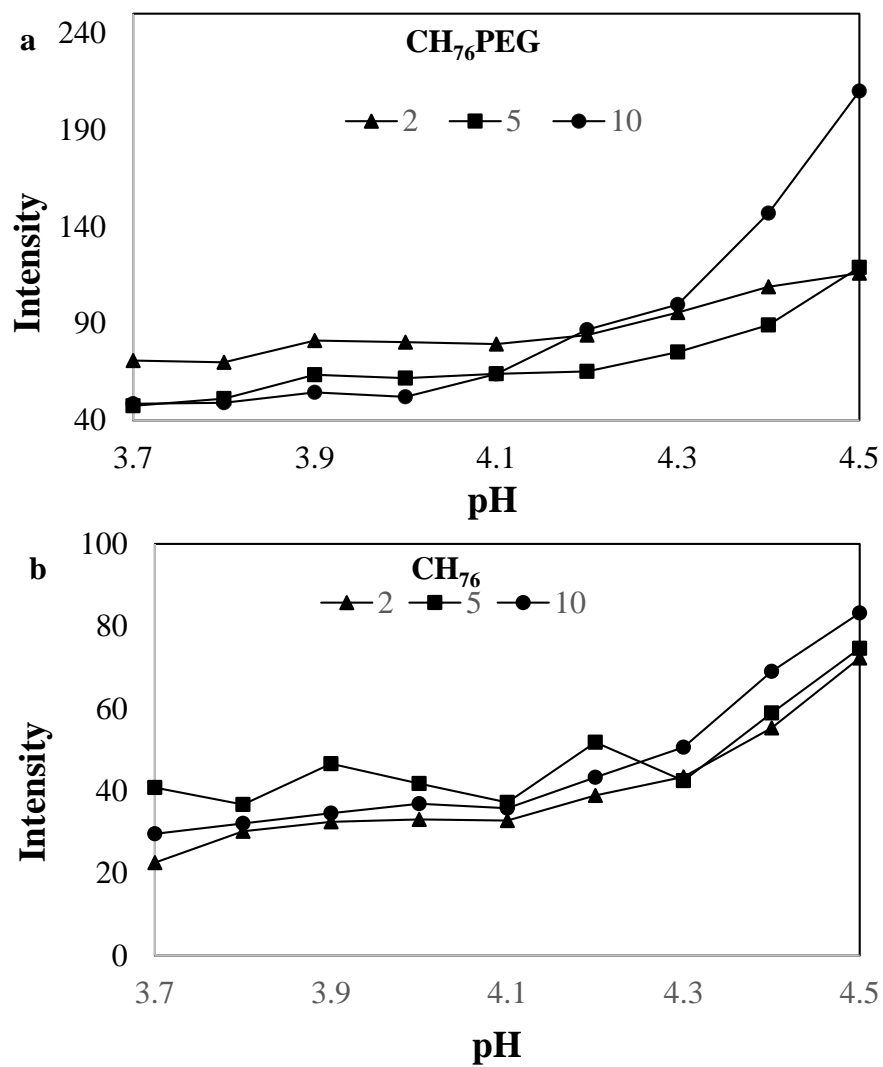

**Figure S2.** Intensity of scattered light at 90 degree scattering angle for mixtures of  $\alpha$ -lactalbumin and (a) CH<sub>76</sub>PEG or (b) CH<sub>76</sub> at different  $r$ -value as a function of solution pH.

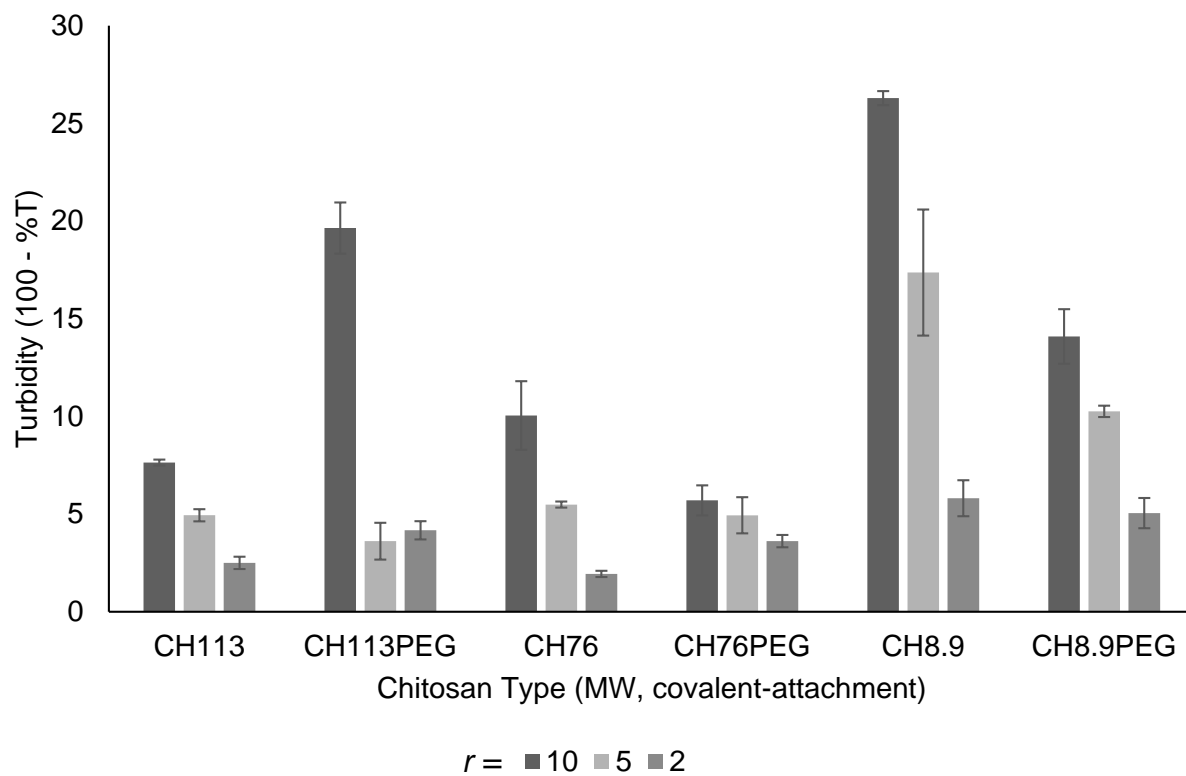

**Figure S3.** Effect of  $r$ -value on turbidity of  $\alpha$ -lac complexes heated at pH 4.8 for mixtures with CH<sub>113</sub>, CH<sub>76</sub>, CH<sub>8.9</sub>, CH<sub>113</sub>PEG, CH<sub>76</sub>PEG, or CH<sub>8.9</sub>PEG.

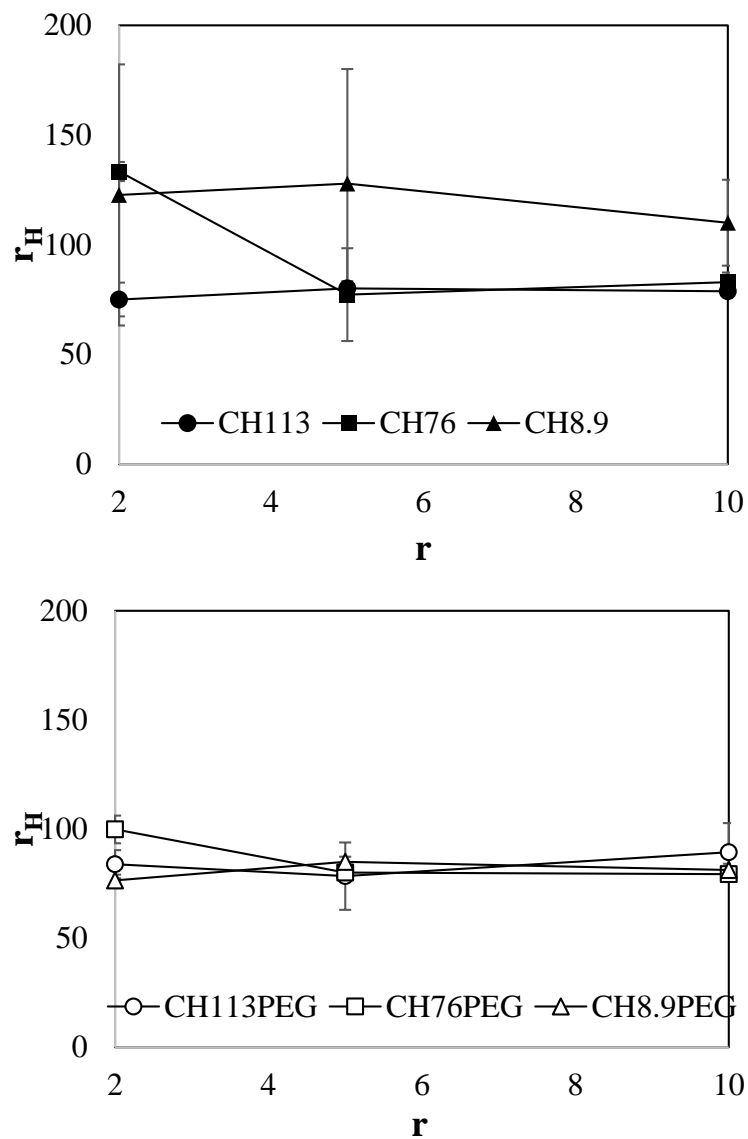

**Figure S4** Effect of  $r$ -value on hydrodynamic radii of detected colloids within heated mixtures of  $\alpha$ -lactalbumin and (a) CH or (b) CH-PEG of different molecular weight at pH 4.8.

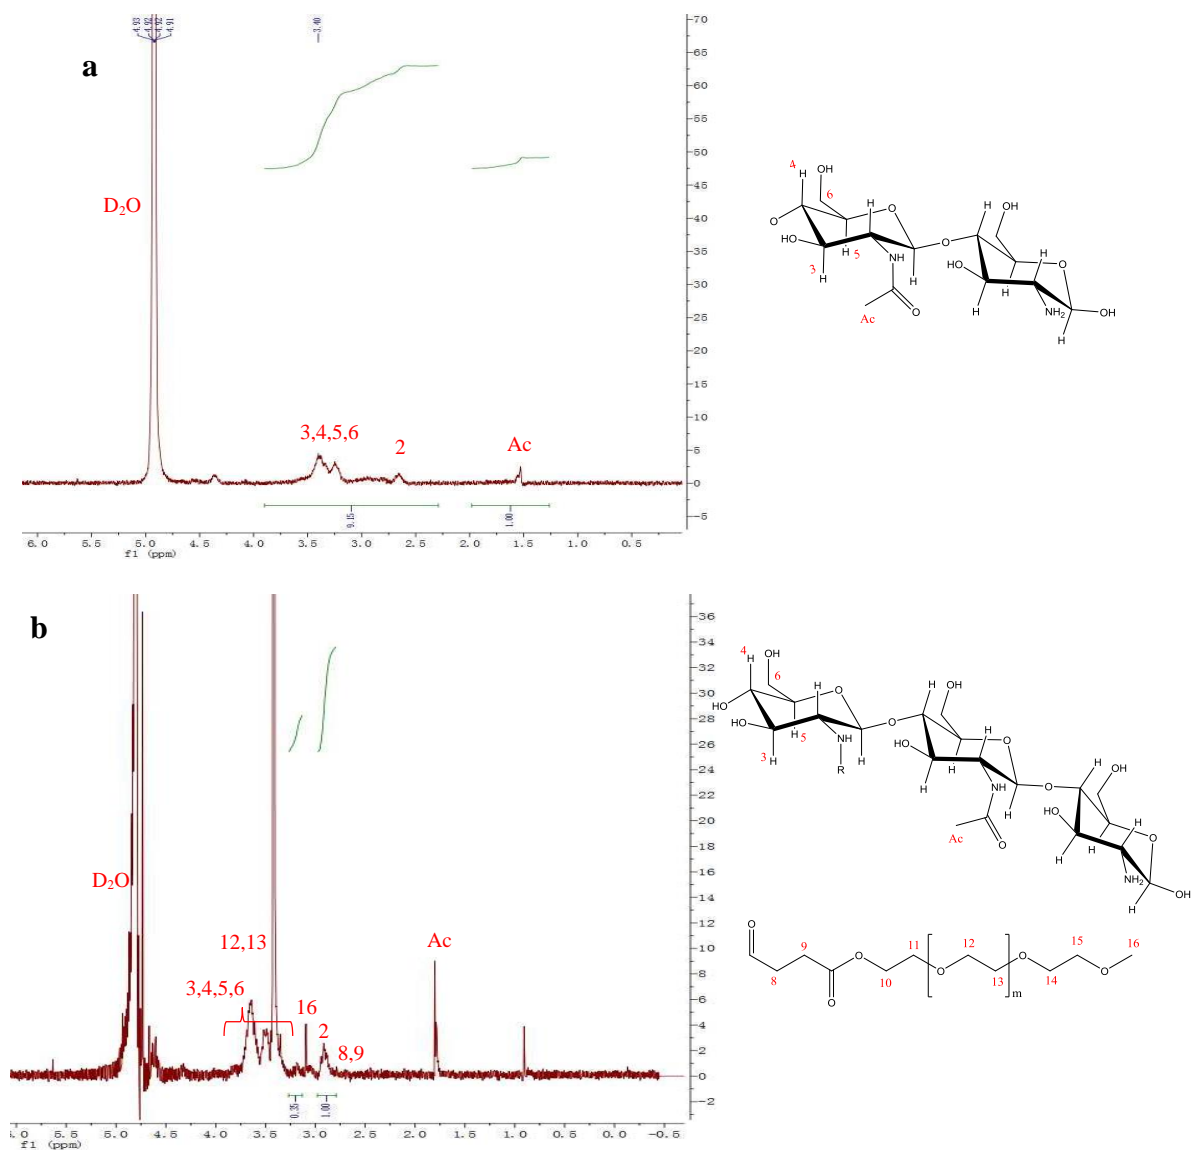

**Figure S5.** 1D Proton NMR spectra of (a) CH<sub>113</sub> and (b) CH<sub>113</sub>PEG in 8% DCl/D<sub>2</sub>O (*v/v*) at concentrations of 5 mg/mL. Schematics of the representative chemical structures and peak assignments are given on the right.

**Table S1.** Turbidity of heated  $\alpha$ -lac/CH<sub>7</sub>%PEG mixtures at different pH and  $r$ -value 1 day after preparation and 14 days after preparation.

| $r$ | pH  | Day 1  | Day 14 |
|-----|-----|--------|--------|
|     |     | 100-T% | 100-T% |
| 5   | 4.3 | 1.37   | 0      |
|     | 4.8 | 5.59   | 2.95   |
|     | 5.3 | 10.26  | 6.67   |
|     | 5.8 | 15.67  | 10.26  |
| 2   | 4.3 | 1.60   | 0      |
|     | 4.8 | 3.39   | 1.37   |
|     | 5.3 | 6.46   | 2.50   |
|     | 5.8 | 7.53   | 3.62   |

Table S1 shows that turbidity of heated mixtures decreased ~30%–60% after 2 weeks of storage (data at pH 4.3 was below noise threshold), possibly due to sedimentation of the largest nanogels in the suspensions and/or separation of dust or bubbles from sample tubes during storage. However, the general trend of turbidity between samples remained identical. This implied that mixtures with higher turbidity on day 1 possessed nanogels of larger average size and/or number compared to sample mixtures of lower turbidity, and this relation persisted following storage so that the same sample mixtures possessed nanogels of larger average size and/or number after 2 weeks.
